# Supplementary material for: Nanocrystalline structured ethylene glycol doped maghemite for persistent pollutants removal
Source: Royal Society of Chemistry journal article supplement (doi:10.1039/d2ew00986b), 2023-01-01
Supplement: d2ew00986b1.pdf [file d2ew00986b1.pdf]

## Nanocrystalline structured ethylene glycol doped maghemite for persistent pollutants removal

Andreea Elena Maftai<sup>1\*</sup>, Imad Ahmed<sup>2,5</sup>, Mariana Neamtu<sup>1</sup>, Cristina Giorgiana Coromelci<sup>1</sup>, Maria Ignat<sup>3</sup>,  
Loredana Brinza<sup>4\*</sup>

<sup>1</sup>Department of Exact Sciences and Natural Sciences, Institute of Interdisciplinary Research, „Alexandru Ioan Cuza” University of Iași, 11, Carol I Bvd, 700506, Iași, Romania

<sup>2</sup>Department of Earth Sciences, University of Oxford, South Parks Road, OX1 3AN, United Kingdom

<sup>3</sup>Department of Chemistry, „Alexandru Ioan Cuza” University of Iasi, 11, Carol I Bvd, 700506, Iași, Romania

<sup>4</sup>Integrated Centre of Environmental Science Studies in the North Eastern Region, Department of Exact Sciences and Natural Sciences, Institute of Interdisciplinary Research, Alexandru Ioan Cuza” University of Iași, 11, Carol I Bvd, 700506, Iași, Romania

<sup>5</sup>Nanolyse Technologies Ltd, 167-169, Great Portland Street, London, England, W1W 5PF

### Electronic supplementary information

---

\* Corresponding authors: [andreea.maftei@uaic.ro](mailto:andreea.maftei@uaic.ro), [loredana.brinza@uaic.ro](mailto:loredana.brinza@uaic.ro)

## Materials and Methods

### *Chemical structure of RY84 and EG*

The chemical structure of RY84 and EG used for graphical representation of containing functional groups were downloaded from an international NIH.GOV database available at:

[C.I.Reactive Yellow 84 | C52H38Cl2N18O26S8 - PubChem \(nih.gov\)](https://pubchem.ncbi.nlm.nih.gov/compound/Reactive-Yellow-84)

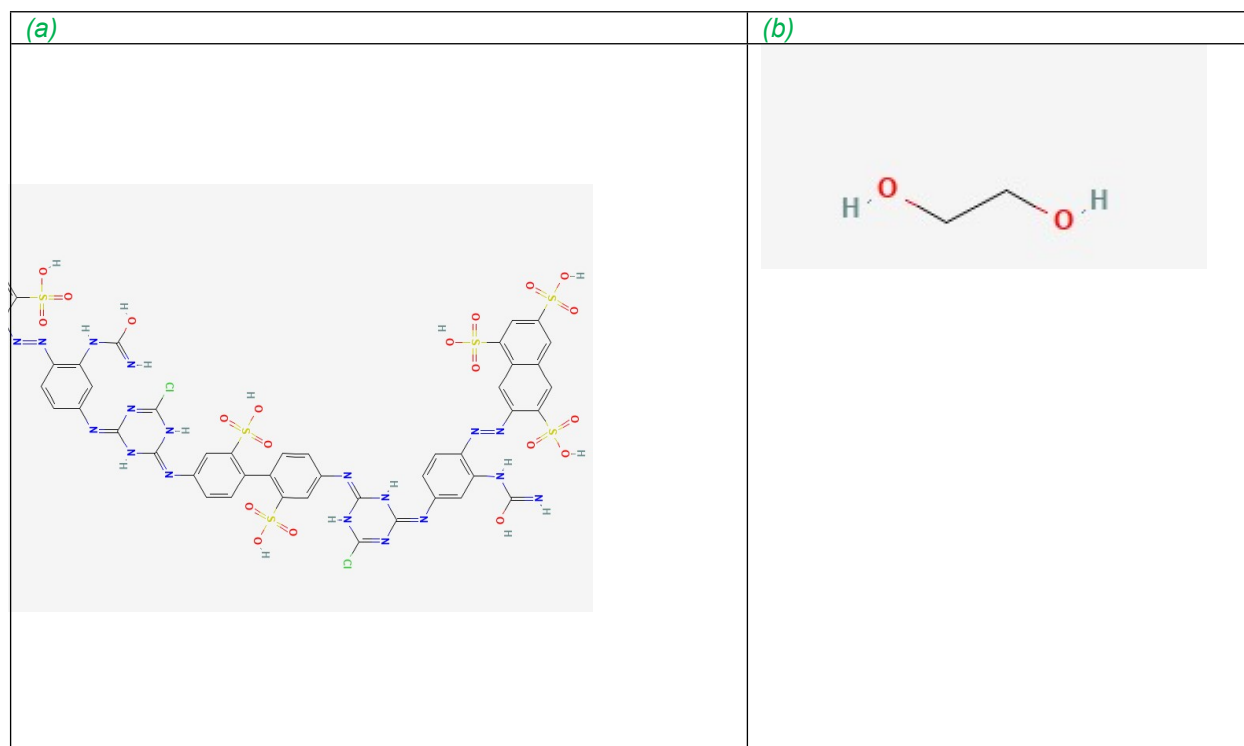

[Ethylene Glycol | CH<sub>2</sub>OHCH<sub>2</sub>OH - PubChem \(nih.gov\)](https://pubchem.ncbi.nlm.nih.gov/compound/Ethylene-glycol)

**Fig. S1.** Chemicals structures of (a) Reactive Yellow 84 and (b) Ethylene glycol.

### *Flame atomic adsorbtion spectrophotometri (FAAS)*

An Analytic Jena, FAAS CONTRAA 300 series was used for measuring Fe concentration in adsorbtion supernatant after adsorbtion in order to check the stability of the nanoparticle during the adsorbtion.

FAAS setting used for Fe determination were: flame type: Air/Acetylene, Flare flow: 60 L/h, Burner height: 5-8mm. Calibration curve was set at 0-1mg/L interval. The sensitivity of FAAS for Fe was 0.07 mg/L.

#### *X-ray diffraction (XRD)*

The XRD analysed used for mineralogical characterization of the nanoparticles after adsorption was a Shimadzu X-ray diffractometer using Cu-K $\alpha$  radiation ( $\lambda=1.5418\text{\AA}$ ) at 40 kV and 30 mA. The diffraction pattern in the 20–80° 2 $\theta$  range was collected at a scanning angle step of 0.02° and 2°/min<sup>-1</sup> scan speed.

## Results

#### *Adsorption studies: kinetic and isotherm modeling*

**Table S1** Langmuir's separation factor

| Co, mg/L | K <sub>L</sub> | R <sub>L</sub> |
|----------|----------------|----------------|
| 10       | 0.089          | 0.529          |
| 20       |                | 0.359          |
| 30       |                | 0.272          |
| 40       |                | 0.219          |
| 60       |                | 0.158          |
| 100      |                | 0.086          |

**Table S2** Summary of fitting parameters from adsorption isotherms modelling with the Langmuir and Freundlich models

|                                                                                                                      | Langmuir isotherm                                                                                 | Freundlich isotherm                                   |
|----------------------------------------------------------------------------------------------------------------------|---------------------------------------------------------------------------------------------------|-------------------------------------------------------|
| <b>Parameters</b>                                                                                                    | q <sub>max</sub> = 37.73±9.69 mg/g<br>K <sub>L</sub> = 0.089±0.07<br>R <sub>L</sub> =0.0856±0.529 | K <sub>F</sub> = 9.267±2.09 mg/g<br>1/n = 0.306±0.06  |
| <b>Statistics</b>                                                                                                    | Adj. R <sup>2</sup> = 0.643<br>R <sup>2</sup> = 0.634                                             | Adj. R <sup>2</sup> = 0.867<br>R <sup>2</sup> = 0.867 |
| Experimental conditions: C <sub>RY84</sub> = 10 to 100 mg/L, batch adsorption at pH 4, T=RT, C <sub>ads</sub> = 1g/L |                                                                                                   |                                                       |

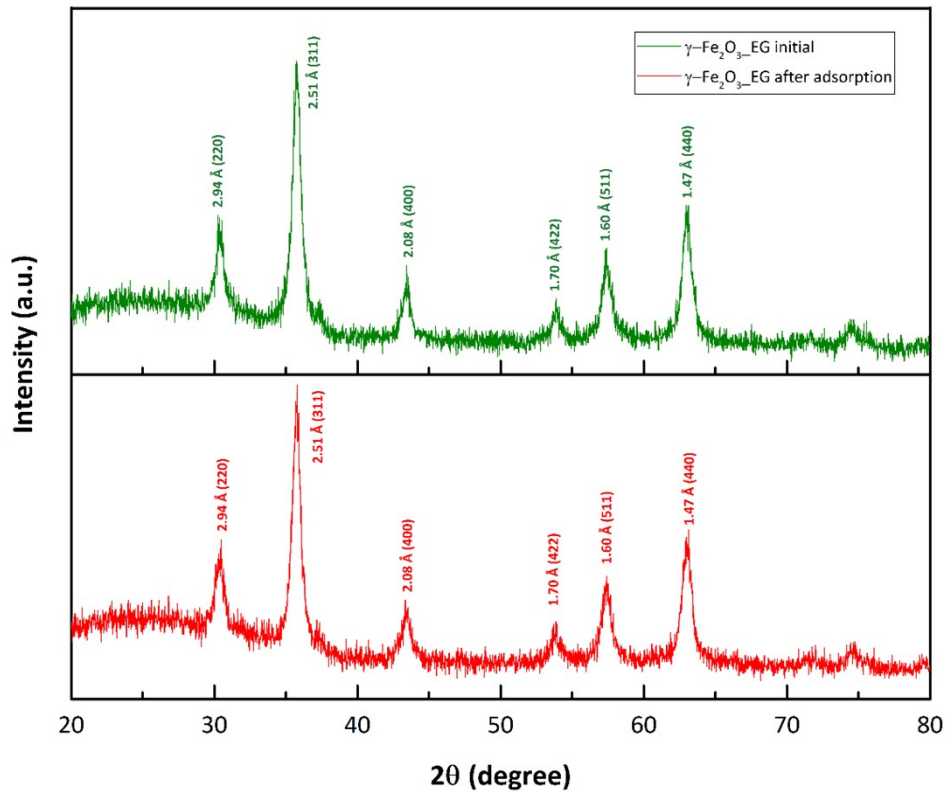

**Fig. S2** XRD results for the maghemite doped with Ethylene Glycol after adsorption experiments, showing identical patterns as before adsorption, indicating that nanoparticles remained stable during the adsorption and did not transformed in other iron oxides.

#### Dye adsorption from wastewater

**Table S3** Chemical and physical parameters of non-diluted wastewater effluent from the WWTP

| Parameter                    | Unit                | Value  | Parameter     | Unit  | Value |
|------------------------------|---------------------|--------|---------------|-------|-------|
| pH                           | unit. pH            | 7.40   | Sulphides     | mg/L  | 0.05  |
| BOD5                         | mgO <sub>2</sub> /L | 9.00   | TSP           | mg/L  | 12.00 |
| COD                          | mgO <sub>2</sub> /L | <30.00 | Fixed residue | mg/L  | 480   |
| NH <sub>4</sub> <sup>+</sup> | mg/L                | 0.069  | Total N       | mg/L  | 7.40  |
| NO <sub>2</sub>              | mg/L                | <0.040 | Total P       | mg/L  | 0.67  |
| NO <sub>3</sub>              | mg/L                | 29.97  | Conductivity  | μS/cm | 750   |
